# Supplementary material for: Brazilian guidelines for the management of psychomotor agitation. Part 2. Pharmacological approach
Source: PubMed Central journal article supplement — Braz J Psychiatry. 2019 Mar 7;41(4):324–35. doi: 10.1590/1516-4446-2018-0177 (PMC6804299; doi:10.1590/1516-4446-2018-0177), 2019-03-07
Supplement: bjp-41-04-324-s001.pdf [file bjp-41-04-324-s001.pdf]

**Table S1** Selected articles on the pharmacological management of psychomotor agitation

| Reference               | Population                                                                                 | Intervention                                                                                                                            | Route | Study type        | Primary efficacy outcome measure                                                       | Adverse events                                                                                                                  | Level of evidence                                                                                                                                                                  |
|-------------------------|--------------------------------------------------------------------------------------------|-----------------------------------------------------------------------------------------------------------------------------------------|-------|-------------------|----------------------------------------------------------------------------------------|---------------------------------------------------------------------------------------------------------------------------------|------------------------------------------------------------------------------------------------------------------------------------------------------------------------------------|
| Agid <sup>1</sup>       | 79 hospitalized patients with psychotic disorder and acute agitation                       | Ziprasidone (2 mg) vs. ziprasidone (20 mg)                                                                                              | IM    | RCT               | PANSS                                                                                  | None                                                                                                                            | 2B<br>Ziprasidone IM may be associated with more rapid improvement in psychotic symptoms.                                                                                          |
| Ahmed <sup>2</sup>      | 30 individuals acutely aggressive or agitated due to psychotic illness                     | Chlorpromazine (50 mg) vs. haloperidol (5 mg)                                                                                           | IM    | Systematic review | Rapid tranquilization                                                                  | Sudden, serious hypotension, status epilepticus                                                                                 | 2A<br>Where drugs that have been better evaluated are available, it may be best to avoid use of chlorpromazine.                                                                    |
| Alexander <sup>3</sup>  | 200 people with agitation, aggression, or violent behavior                                 | Haloperidol (10 mg) + promethazine (25-50 mg) vs. lorazepam (4 mg)                                                                      | IM    | RCT               | Tranquil or asleep 15 min, 30 min, 60 min, 120 min, and 240 min after first medication | Moderate worsening of respiratory difficulty, nausea, and dizziness with lorazepam                                              | 1B<br>Both interventions are effective for controlling violent/agitated behavior.                                                                                                  |
| Allen <sup>4</sup>      | 129 agitated patients due to schizophrenia, schizophreniform, and schizoaffective disorder | Loxapine (5 mg) vs. loxapine (10 mg) vs. placebo                                                                                        | IN    | RCT               | PANSS-EC                                                                               | Sedation and dysgeusia                                                                                                          | 1B<br>Inhaled loxapine was generally safe and well-tolerated and produced rapid improvement in agitated patients with psychotic disorders.                                         |
| Allen <sup>5</sup>      | 40 agitated patients with schizophrenia and nicotine dependence                            | Nicotine (21 mg) vs. placebo                                                                                                            | TD    | RCT               | ABS and PANSS-EC                                                                       | Drowsy                                                                                                                          | 2B<br>The mean ABS score for the nicotine replacement group was 33% lower at 4 hours and 23% lower at 24 hours than for the placebo group.                                         |
| Andrezina <sup>6</sup>  | 448 patients with agitation associated with schizophrenia or schizoaffective disorder      | Aripiprazole (9.75 mg) vs. haloperidol (7.5 mg) vs. placebo                                                                             | IM    | RCT               | Mean change in PANSS-EC score from baseline to 2 hours after first injection           | Headache, dizziness, nausea, and insomnia with aripiprazole<br>Insomnia, headache, and extrapyramidal disorder with haloperidol | 1B<br>Aripiprazole was non-inferior to haloperidol.                                                                                                                                |
| Asadollahi <sup>7</sup> | 160 agitated patients                                                                      | Haloperidol (5 mg) + placebo vs. sodium valproate (20 mg/kg) + placebo                                                                  | IV    | RCT               | ABS, ACES, and PANSS-EC at 30 min                                                      | Intense sedation and EPS with haloperidol                                                                                       | 2B<br>Intravenous valproate is as effective as haloperidol in reducing agitation with a better safety profile.                                                                     |
| Baldaçara <sup>8</sup>  | 150 patients with agitation due to psychosis or bipolar disorder                           | Olanzapine (10 mg) vs. ziprasidone (20 mg) vs. haloperidol (5 mg) + promethazine (50 mg) vs. haloperidol (5 mg) + midazolam (15 mg) vs. | IM    | RCT               | OASS and OAS at 1, 2, 4, 6, and 12 hours after first medication                        | Sedation and EPS                                                                                                                | 2B<br>Olanzapine, ziprasidone, haloperidol + promethazine, haloperidol + midazolam and haloperidol were effective in controlling agitation and aggression caused by mental illness |

| Reference             | Population                                                                                                                                           | Intervention                                                                                                                  | Route | Study type               | Primary efficacy outcome measure                                                                                         | Adverse events                                                                                                                                                                                                                                                | Level of evidence                                                                                                                                                                   |
|-----------------------|------------------------------------------------------------------------------------------------------------------------------------------------------|-------------------------------------------------------------------------------------------------------------------------------|-------|--------------------------|--------------------------------------------------------------------------------------------------------------------------|---------------------------------------------------------------------------------------------------------------------------------------------------------------------------------------------------------------------------------------------------------------|-------------------------------------------------------------------------------------------------------------------------------------------------------------------------------------|
|                       |                                                                                                                                                      | haloperidol (5 mg).                                                                                                           |       |                          |                                                                                                                          |                                                                                                                                                                                                                                                               | over 12 hours. Although all the drugs had advantages and disadvantages, haloperidol + midazolam was associated with the worst results in all the observed parameters.               |
| Baker <sup>9</sup>    | 148 acutely agitated patients with schizophrenia, schizoaffective disorder, schizophreniform disorder, or bipolar I disorder, manic or mixed episode | Oral olanzapine in rapid initial dose escalation (up to 40 mg) vs. oral olanzapine (10 mg) + oral lorazepam as needed         | PO    | RCT                      | PANSS-EC at 24 hours                                                                                                     | Headache and dizziness in rapid initial dose escalation group                                                                                                                                                                                                 | 2B<br>Olanzapine dosing, at an expanded initial dose range of up to 40 mg/day, was superior in rapidly and effectively controlling the symptoms of agitation without over sedation. |
| Bieniek <sup>10</sup> | 20 subjects treated on the psychiatric emergency service                                                                                             | Lorazepam IM (2 mg) vs. haloperidol IM (5 mg) + lorazepam IM (2 mg).                                                          | IM    | RCT                      | OAS                                                                                                                      | No adverse effects were observed or reported in either treatment group                                                                                                                                                                                        | 2C<br>Repeated measures analyses of variance showed that both groups improved over time, but between-group differences were not significant.                                        |
| Breier <sup>11</sup>  | 270 acutely agitated patients with schizophrenia                                                                                                     | Olanzapine (2.5 mg) vs. olanzapine (5 mg) vs. olanzapine (7.5 mg) vs. olanzapine (10 mg) vs. haloperidol (7.5 mg) vs. placebo | IM    | RCT                      | PANSS-EC                                                                                                                 | Hypotension with olanzapine and acute dystonia with haloperidol                                                                                                                                                                                               | 2B<br>All olanzapine groups and haloperidol group had decreased agitation compared with placebo.                                                                                    |
| Castle <sup>12</sup>  | 2,011 acutely agitated patients with schizophrenia or acute mania                                                                                    | Olanzapine vs. other antipsychotics                                                                                           | IM    | Observational, multisite | PANSS-EC and CGI-S at 2, 24, and 72 hours and at 7 days following initial injection and on oral antipsychotic transition | EPSs                                                                                                                                                                                                                                                          | 2C<br>IM olanzapine provided somewhat more effective control of acute agitation than other assessed IM antipsychotics.                                                              |
| Chan <sup>13</sup>    | 336 agitated patients                                                                                                                                | Droperidol (5 mg) + midazolam (2.5-5 mg) vs. olanzapine (5 mg) + midazolam (2.5-5 mg) vs. placebo + midazolam (2.5-5 mg)      | IV    | RCT                      | Sedation at 5 and 10 min; need for additional medication                                                                 | Need for airway management (jaw thrust, oral/nasal airway) or assisted ventilation (bag-valve-mask, intubation), oxygen desaturation, systolic blood pressure less than 90 mmHg, dystonic reactions, seizures, vomiting or aspiration, and movement disorders | 1B<br>IV droperidol or olanzapine as an adjunct to midazolam is effective and decreases the time to adequate sedation compared with midazolam alone.                                |

| Reference                       | Population                                                               | Intervention                                                                                     | Route  | Study type       | Primary efficacy outcome measure                                | Adverse events                                                                                                                                             | Level of evidence                                                                                                                                                                                                                |
|---------------------------------|--------------------------------------------------------------------------|--------------------------------------------------------------------------------------------------|--------|------------------|-----------------------------------------------------------------|------------------------------------------------------------------------------------------------------------------------------------------------------------|----------------------------------------------------------------------------------------------------------------------------------------------------------------------------------------------------------------------------------|
| Chan <sup>14</sup>              | 49 agitated patients with schizophrenia                                  | Olanzapine (10 mg) vs. haloperidol (7.5 mg)                                                      | IM     | RCT              | PANSS-EC at 2 hours                                             | Insomnia                                                                                                                                                   | 2B<br>Both IM olanzapine and IM haloperidol were safe and well-tolerated.                                                                                                                                                        |
| Chouinard <sup>15</sup>         | 16 acutely agitated psychotic patients with manic or manic-like symptoms | Clonazepam (1-2 mg) vs. haloperidol (5-10 mg)                                                    | IM     | RCT              | Reduction of manic symptoms within 2 hours of initial treatment | None                                                                                                                                                       | C<br>IM clonazepam is an effective, safe, but slower-acting alternative to IM haloperidol in the treatment of agitated psychiatric patients in need of rapid tranquilization.                                                    |
| Currier & Simpson <sup>16</sup> | 60 patients in emergency treatment of psychotic agitation                | Oral risperidone (2 mg) + oral lorazepam (2 mg) vs. IM haloperidol (5 mg) + IM lorazepam (2 mg). | VO, IM | RCT              | PANSS, CGI, and time to sedation                                | No patients receiving risperidone demonstrated any side effects or adverse events, while one patient receiving IM haloperidol developed acute dystonia     | 2C<br>Oral treatment with risperidone and lorazepam appears to be a tolerable and comparable alternative to IM haloperidol and lorazepam for short-term treatment of agitated psychosis in patients who accept oral medications. |
| Currier <sup>17</sup>           | 162 patients exhibiting agitation associated with active psychosis       | Oral risperidone (2 mg) + lorazepam (2 mg) vs. IM haloperidol (5 mg) + lorazepam (2 mg)          | PO, IM | RCT              | PANSS at 30, 60, and 120 min after dosing.                      | No differences                                                                                                                                             | 2B<br>A single oral dose of risperidone plus lorazepam was as effective as parenterally administered haloperidol plus lorazepam for the rapid control of agitation and psychosis.                                                |
| Daniel <sup>18</sup>            | 448 agitated patients with schizophrenia or schizoaffective              | Aripiprazole (9.75 mg) vs. haloperidol (6.5 mg) vs. placebo                                      | IM     | RCT              | PANSS-EC at 24 hours                                            | Nausea and vomiting occurred more frequently in patients receiving aripiprazole; extrapyramidal symptom-related adverse events were lower for aripiprazole | 2B<br>Acutely agitated patients with schizophrenia or schizoaffective disorder treated with aripiprazole IM or haloperidol IM demonstrated similar effective and safe transition to their respective oral formulations.          |
| Daniel <sup>19</sup>            | 79 agitated psychotic patients                                           | Ziprasidone (20 mg) vs. ziprasidone (2 mg)                                                       | IM     | RCT              | BARS at 24 hours                                                | None                                                                                                                                                       | 2B<br>Ziprasidone IM 20 mg substantially and significantly reduced the symptoms of acute agitation in patients with psychotic disorders. Ziprasidone 20 mg IM was very well-tolerated and produced no dystonia or akathisia.     |
| De Filippis <sup>20</sup>       | 201 agitated patients with schizophrenia or bipolar disorder             | Aripiprazole (9.75 mg)                                                                           | IM     | Open-label trial | PANSS-EC, ACES, and CGI 30, 60, 90, 120 min, and 24 hours       | None                                                                                                                                                       | 2C<br>Aripiprazole was effective and safe in reducing acute agitation in patients                                                                                                                                                |



| Reference                     | Population                                                            | Intervention                                                                                                                                                                                                                                                                                                                               | Route  | Study type                                                     | Primary efficacy outcome measure                                                                                   | Adverse events                                                                                                                                           | Level of evidence                                                                                                                                                                              |
|-------------------------------|-----------------------------------------------------------------------|--------------------------------------------------------------------------------------------------------------------------------------------------------------------------------------------------------------------------------------------------------------------------------------------------------------------------------------------|--------|----------------------------------------------------------------|--------------------------------------------------------------------------------------------------------------------|----------------------------------------------------------------------------------------------------------------------------------------------------------|------------------------------------------------------------------------------------------------------------------------------------------------------------------------------------------------|
|                               |                                                                       | IV diazepam (30-40 mg)<br>IV haloperidol (20-35 mg)<br>IM flunitrazepam (1 mg)<br>IM lorazepam (2-4 mg) +<br>IM haloperidol (5-10 mg)<br>IV midazolam (4 mg)<br>IV droperidol (4 mg)<br>IM midazolam (15 mg) +<br>haloperidol (5 mg)<br>IM haloperidol (5 mg) +<br>promethazine (50 mg)<br>IM olanzapine (10 mg)<br>IM ziprasidone (20 mg) |        |                                                                |                                                                                                                    |                                                                                                                                                          |                                                                                                                                                                                                |
| Hsu <sup>26</sup>             | 42 inpatients from an acute care psychiatric ward                     | IM olanzapine (10 mg) vs. oral disintegrating tablet olanzapine (10 mg) vs. OS risperidone (3 mg) vs. IM haloperidol (7.5 mg).                                                                                                                                                                                                             | PO, IM | RCT                                                            | PANSS-EC, ACES, and CGI-S at 24 hours                                                                              | Drowsiness                                                                                                                                               | 2C<br>There is no significant difference in effectiveness among IM olanzapine, orally disintegrating olanzapine tablets, and oral risperidone solution.                                        |
| Hatta <sup>27</sup>           | 87 patients scoring $\geq 15$ on PANSS-EC (acute psychotic agitation) | Initial doses of olanzapine ODT and risperidone OS were 10 and 3 mg<br>Mean $\pm$ SD doses of olanzapine ODT and risperidone OS were 10.4 $\pm$ 3.3 and 3.3 $\pm$ 2.6 mg                                                                                                                                                                   | PO     | Pseudorandomized, open-label, flexible-dose, multicenter study | PANSS-EC and CGI at 6 hours                                                                                        | Extrapyramidal symptoms<br>change in heart rate<br>On one physiological parameter (i.e., tachycardia) olanzapine ODT might be superior to risperidone OS | 2B<br>Olanzapine ODT and risperidone OS treatments yielded similar improvements in acutely agitated patients who accepted oral medication.                                                     |
| Huf <sup>28</sup> (version 3) |                                                                       | Haloperidol (up to 10 mg)<br>Haloperidol (2.5-10 mg) + promethazine (25-50 mg)<br>Midazolam (up to 15 mg)<br>Haloperidol (2.5-5 mg) + midazolam (7.5-15 mg)<br>Lorazepam (up to 4 mg)<br>Olanzapine (5-10 mg)<br>Ziprasidone (10-20 mg)                                                                                                    | IM     | Systematic review                                              | Being tranquil                                                                                                     | Excessive sedation, respiratory depression with midazolam and lorazepam, haloperidol more EPS                                                            | 1A<br>All treatments evaluated in the review were effective. More swift haloperidol + promethazine and midazolam. The study did not detect an advantage in the use of haloperidol monotherapy. |
| Huf <sup>29</sup>             | 316 patients with agitation or dangerous behavior                     | Haloperidol (5-10 mg) vs. haloperidol (5-10 mg) + promethazine (50 mg)                                                                                                                                                                                                                                                                     | IM     | Pragmatic, RCT                                                 | Tranquil or asleep by 20 min; secondary outcomes were asleep by 20 min; tranquil or asleep by 40, 60, and 120 min. | Dystonia, seizure                                                                                                                                        | 1B<br>Haloperidol + promethazine is a better option than haloperidol alone in terms of speed of onset of action and safety.                                                                    |
| Isbister <sup>30</sup>        | 91 patients with violent and acute behavioral                         | Droperidol (10 mg) vs. midazolam (5 mg) vs.                                                                                                                                                                                                                                                                                                | IM     | RCT                                                            | Duration of the violent and acute behavioral                                                                       | Abnormal QT with droperidol                                                                                                                              | 2B<br>IM droperidol and midazolam resulted                                                                                                                                                     |

| Reference              | Population                                                                                                           | Intervention                                                                            | Route | Study type | Primary efficacy outcome measure                                                                      | Adverse events                                                                                                                                              | Level of evidence                                                                                                                                                                                                                                                                             |
|------------------------|----------------------------------------------------------------------------------------------------------------------|-----------------------------------------------------------------------------------------|-------|------------|-------------------------------------------------------------------------------------------------------|-------------------------------------------------------------------------------------------------------------------------------------------------------------|-----------------------------------------------------------------------------------------------------------------------------------------------------------------------------------------------------------------------------------------------------------------------------------------------|
|                        | disturbance                                                                                                          | droperidol (10 mg) + midazolam (5 mg)                                                   |       |            | disturbance                                                                                           | Over sedation with midazolam                                                                                                                                | in a similar duration of violent and acute behavioral disturbance, but more additional sedation was required with midazolam. Midazolam caused more adverse effects because of over sedation, and there was no evidence of QT prolongation associated with droperidol compared with midazolam. |
| Katagiri <sup>31</sup> | 90 agitated patients with schizophrenia                                                                              | Olanzapine (10 mg) vs. placebo                                                          | IM    | RCT        | PANSS-EC at 2 hours                                                                                   | Orthostatic hypotension, somnolence, blood urine                                                                                                            | 2B<br>The efficacy of IM olanzapine 10 mg in patients with exacerbation of schizophrenia with acute psychotic agitation was greater than IM placebo in the primary efficacy measure, PANSS-EC.                                                                                                |
| Kinon <sup>32</sup>    | 100 acutely agitated inpatients who were diagnosed with schizophrenia, schizophreniform, or schizoaffective disorder | Olanzapine (10 mg) vs. haloperidol (10 mg) on the first day<br>Lorazepam was adjunctive | PO    | RCT        | PANSS, CGI, OASS, and side effects. Patients were assessed in the first 24 hours and then for 3 weeks | EPSs; asthenia, dry mouth, somnolence, and tachycardia in those patients who received adjunctive lorazepam; hypotension, nausea, or confusion for lorazepam | 2B<br>Oral olanzapine is as efficacious as oral haloperidol in reducing acute agitation in patients with schizophrenia. Significant within-group improvement was demonstrated in PANSS. Agitation scores for both groups as early as 1 hour after initiating therapy.                         |
| Knott <sup>33</sup>    | 153 agitated patients due to psychiatric illness or substance abuse                                                  | Droperidol (2.5-5 mg) vs. midazolam (2.5-5 mg)                                          | IV    | RCT        | Sedation                                                                                              | Hypoventilation with midazolam                                                                                                                              | 2B<br>There is no difference in onset of adequate sedation of agitated patients using midazolam or droperidol. Patients sedated with midazolam may have an increased need for active airway management.                                                                                       |
| Kwentus <sup>34</sup>  | 314 agitated patients with bipolar disorder                                                                          | Loxapine (5 mg) vs. loxapine (10 mg) vs. placebo                                        | IN    | RCT        | PANSS-EC                                                                                              | EPS and hypotension                                                                                                                                         | 1B<br>IN loxapine provided a rapid, non-injection, well-tolerated acute treatment for agitation in patients with bipolar I disorder.                                                                                                                                                          |
| Lesem <sup>35</sup>    | 117 agitated psychotic patients                                                                                      | Ziprasidone (10 mg) vs. ziprasidone (2 mg)                                              | IM    | RCT        | BARS                                                                                                  | Akathisia                                                                                                                                                   | 2B<br>Ziprasidone 10 mg IM is rapidly effective and well-tolerated in the short-term management of the agitated psychotic patient.                                                                                                                                                            |

| Reference                | Population                                                                                       | Intervention                                                                                                                                                                                                                        | Route  | Study type                      | Primary efficacy outcome measure                               | Adverse events                                                                                                                            | Level of evidence                                                                                                                                                                                                                                                                                                                                                                                                                                                                             |
|--------------------------|--------------------------------------------------------------------------------------------------|-------------------------------------------------------------------------------------------------------------------------------------------------------------------------------------------------------------------------------------|--------|---------------------------------|----------------------------------------------------------------|-------------------------------------------------------------------------------------------------------------------------------------------|-----------------------------------------------------------------------------------------------------------------------------------------------------------------------------------------------------------------------------------------------------------------------------------------------------------------------------------------------------------------------------------------------------------------------------------------------------------------------------------------------|
| Lesem <sup>36</sup>      | 344 agitated patients with schizophrenia                                                         | Loxapine (5 mg) vs. loxapine (10 mg) vs. placebo                                                                                                                                                                                    | IN     | RCT                             | PANSS-EC                                                       | Sedation, dysgeusia, and dizziness<br>EPS with loxapine 10 mg                                                                             | 2B<br>IN loxapine provided a rapid, well-tolerated acute treatment for agitation in people with schizophrenia.                                                                                                                                                                                                                                                                                                                                                                                |
| Lim <sup>37</sup>        | 124 patients with psychotic agitation at the emergency room or inpatient ward                    | ODT risperidone (2-6 mg) vs. IM haloperidol (5-15 mg)                                                                                                                                                                               | PO, IM | RCT                             | PANSS-EC and CGI-S                                             | Risperidone ODT: somnolence, headache, EPS, dizziness, and insomnia<br>IM haloperidol: EPS, somnolence, headache, and dizziness           | 1B<br>Risperidone orodispersible tablet was as effective and tolerable as IM administration of haloperidol.                                                                                                                                                                                                                                                                                                                                                                                   |
| MacDonald <sup>38</sup>  | 105 patients with agitation with (D/A+) or without (D/A-) alcohol or another drugs intoxication. | Haloperidol alone vs. haloperidol + any BZD vs. olanzapine alone vs. olanzapine + any BZD<br>The most common doses in our sample were haloperidol 5 mg and olanzapine 10 mg; lorazepam 2 mg was the most frequently prescribed BZD. | IM     | Observational, retrospective    | CGI and additional medication intervention at 3 hours          | Compared to the use of antipsychotic alone, addition of a BZD to either antipsychotic increased the ratings of post-intervention sedation | 4C<br>The haloperidol-BZD combination was the most frequently prescribed treatment in both groups, although alcohol (+) status biased clinicians toward using haloperidol alone. Overall, D/A(+) and D/A(-) patients responded to the initial intervention at similar rates, although D/A(+) patients were rated as more agitated and had more post-treatment sedation than D/A(-) patients. In D/A(+) patients, haloperidol + BZD and IM olanzapine performed better than haloperidol alone. |
| MacDonald <sup>39</sup>  | 146 agitated patients                                                                            | Haloperidol (5 mg) vs. haloperidol (5 mg) + lorazepam (2 mg) vs. olanzapine (10 mg) vs. olanzapine (10 mg) + lorazepam (2 mg)                                                                                                       | IM     | Multicenter retrospective study | Additional medication and adverse effects at 3 hours<br>CGI-S. | Sedation                                                                                                                                  | 2C<br>Haloperidol monotherapy is less effective at least in requiring additional medication than olanzapine with or without a BZD or haloperidol plus a BZD. Moreover, these later three regimens seemed comparable.                                                                                                                                                                                                                                                                          |
| Man & Chen <sup>40</sup> | 30 acutely psychotic patients                                                                    | Haloperidol IM (5 mg) vs. chlorpromazine IM (50 mg)                                                                                                                                                                                 | IM     | CT                              | BPRS                                                           | Hypotension                                                                                                                               | 4C<br>Haloperidol 5 mg IM or chlorpromazine 50 mg IM, administered at 30-min intervals brought about rapid amelioration of the severe unmanageable symptoms of hostility, agitation, assaultiveness, and mania in acutely psychotic patients. However,                                                                                                                                                                                                                                        |

| Reference               | Population                                                         | Intervention                                                                                                                             | Route | Study type                                                | Primary efficacy outcome measure                        | Adverse events                                                                                                                                 | Level of evidence                                                                                                                                                                                                                                                                                                                  |
|-------------------------|--------------------------------------------------------------------|------------------------------------------------------------------------------------------------------------------------------------------|-------|-----------------------------------------------------------|---------------------------------------------------------|------------------------------------------------------------------------------------------------------------------------------------------------|------------------------------------------------------------------------------------------------------------------------------------------------------------------------------------------------------------------------------------------------------------------------------------------------------------------------------------|
| Mantovani <sup>41</sup> | 100 agitated patients in an emergency psychiatric service          | Haloperidol (2.5 mg) + promethazine (25 mg) vs. haloperidol (2.5 mg) + midazolam (7.5 mg) vs. ziprasidone (10 mg) vs. olanzapine (10 mg) | IM    | RCT                                                       | ACES and PANSS-EC                                       | EPS<br>A higher risk for the development of extrapyramidal symptoms within the following 24 hours was observed with haloperidol + promethazine | haloperidol appeared to be a much safer drug than chlorpromazine because of the lack of severe hypotensive reaction for hypersensitivity.<br><br>2B<br>Low doses of haloperidol combined with midazolam can be as effective as olanzapine in reducing psychomotor agitation without increasing the risk of extrapyramidal effects. |
| Martel <sup>42</sup>    | 144 patients with acute undifferentiated agitation                 | Droperidol (5 mg) vs. ziprasidone (20 mg) vs. midazolam (5 mg)                                                                           | IM    | RCT                                                       | Altered Mental Status scale                             | Akathisia with droperidol and ziprasidone                                                                                                      | 2B<br>Acutely agitated ED patients sedated with droperidol or ziprasidone required rescue medications to achieve adequate sedation less frequently than those sedated with midazolam. The onset of adequate sedation is delayed with ziprasidone, relative to the other agents.                                                    |
| Nobay <sup>43</sup>     | 111 violent and severely agitated patients                         | Midazolam (5 mg) vs. lorazepam (2 mg) vs. haloperidol (5 mg)                                                                             | IM    | RCT                                                       | Thomas Combativeness Scale                              | Hypotension and apnea with haloperidol                                                                                                         | 2B<br>Midazolam has a significantly shorter time to onset of sedation and a more rapid time to arousal than lorazepam or haloperidol. The efficacies of all three drugs appear to be similar.                                                                                                                                      |
| Normann <sup>44</sup>   | 191 schizophrenic patients were treated upon admission to hospital | Risperidone orally disintegrating tablets.                                                                                               | ODT   | Multi-center, prospective, open-label observational trial | PANSS at 2, 24 and 48 hours after initiation of therapy | None                                                                                                                                           | 2B<br>Oral treatment of acutely exacerbated schizophrenic patients with fast orally disintegrating risperidone tablets, alone or in combination with BZDs, was associated with a rapid onset of action and a significant and clinically relevant improvement of acute symptoms.                                                    |
| Perrin <sup>45</sup>    | 1,945 agitated patients with schizophrenia and bipolar mania       | Olanzapine vs. other psychotropic medications                                                                                            | IM    | Naturalistic, observational                               | CGI-S                                                   | EPS                                                                                                                                            | 2C<br>No differences between groups.                                                                                                                                                                                                                                                                                               |



| Reference                      | Population                                                                                                   | Intervention                                                                                     | Route | Study type    | Primary efficacy outcome measure                               | Adverse events                                                                             | Level of evidence                                                                                                                                                                                                                                                        |
|--------------------------------|--------------------------------------------------------------------------------------------------------------|--------------------------------------------------------------------------------------------------|-------|---------------|----------------------------------------------------------------|--------------------------------------------------------------------------------------------|--------------------------------------------------------------------------------------------------------------------------------------------------------------------------------------------------------------------------------------------------------------------------|
| Pratts <sup>46</sup>           | 120 subjects with acute agitation                                                                            | Asenapine SL (10 mg) vs. placebo                                                                 | SL    | RCT           | PANSS-EC score at 2 hours                                      | None                                                                                       | 1B<br>Sublingual asenapine was efficacious in the treatment of agitation. NNT for response vs. placebo was 3 (95%CI 2-4).                                                                                                                                                |
| Preval <sup>47</sup>           | 119 agitation in psychoses or alcohol intoxication                                                           | Ziprasidone (20 mg) vs. haloperidol vs. haloperidol + lorazepam vs. chlorpromazine vs. lorazepam | IM    | Observational | BARS                                                           | Dystonic reaction with ziprasidone                                                         | 4C<br>IM ziprasidone appears effective for severe agitation, including agitation associated with alcohol or substance intoxication, and may reduce time in restraints.                                                                                                   |
| Raveendran <sup>48</sup>       | 300 adults with agitated or violent behavior                                                                 | Haloperidol (10 mg) + promethazine (25-50 mg) vs. olanzapine (10 mg)                             | IM    | RCT           | Tranquil or asleep at 15 and 240 min                           | Hypotension, seizure, dystonia                                                             | 1B<br>IM olanzapine and IM haloperidol plus promethazine were effective at rapidly tranquilizing or sedating agitated or violent patients with mental illness, but the combination resulted in fewer additional medical interventions within four hours of intervention. |
| Resnick & Burton <sup>49</sup> | 27 acutely agitated patients                                                                                 | Droperidol IM (5 mg) vs. haloperidol IM (5 mg)                                                   | IM    | RCT           | BPRS at 30 min                                                 | None                                                                                       | 2C<br>At 30 min following treatment, 81% of the patients treated with haloperidol but only 36% treated with droperidol required a second injection.                                                                                                                      |
| Richards <sup>50</sup>         | 202 agitated patients due to psychosis or drug abuse (methamphetamine toxicity was present in most patients) | Droperidol (2.5-5 mg) vs. lorazepam (2-4 mg)                                                     | IV    | RCT           | Sedation and adverse reactions at 0, 5, 10, 15, 30, and 60 min | Reduction in pulse, systolic blood pressure, respiratory rate, and temperature over 60 min | 2B<br>Droperidol produces a more rapid and better sedation than lorazepam at the doses used in this study in agitated patients requiring chemical restraint. Lorazepam is more likely to require repeat dosing than droperidol.                                          |
| Rosen <sup>51</sup>            | 46 agitated patients                                                                                         | Droperidol (5 mg) vs. placebo                                                                    | IV    | RCT           | Agitation levels and GCS at 5 and 10 min after medication      | EPS                                                                                        | 2B<br>We conclude that droperidol is effective in sedating combative patients in the prehospital setting.                                                                                                                                                                |
| Suzuki <sup>52</sup>           | 122 agitated patients with schizophrenia                                                                     | Olanzapine (5-10 mg) vs. haloperidol (2.5-5 mg) vs. levomepromazine (25 mg)                      | IM    | Observational | PANSS-EC, ACES, and BARS                                       | EPS, hypotension, hypertension, somnolence, dizziness, paralytic ileus, and ketoacidosis   | 2C<br>The results of this study suggest the possibility that the anti-agitation effects of IM olanzapine and IM levomepromazine are more rapid than                                                                                                                      |

| Reference                              | Population                                                                                                                         | Intervention                                                                                                                           | Route                                              | Study type               | Primary efficacy outcome measure                                                                                                                                                                                                                                                                                                                                               | Adverse events                                                                                                                                      | Level of evidence                                                                                                                                                                                                                                  |
|----------------------------------------|------------------------------------------------------------------------------------------------------------------------------------|----------------------------------------------------------------------------------------------------------------------------------------|----------------------------------------------------|--------------------------|--------------------------------------------------------------------------------------------------------------------------------------------------------------------------------------------------------------------------------------------------------------------------------------------------------------------------------------------------------------------------------|-----------------------------------------------------------------------------------------------------------------------------------------------------|----------------------------------------------------------------------------------------------------------------------------------------------------------------------------------------------------------------------------------------------------|
| Taylor <sup>53</sup>                   | 361 agitated patients                                                                                                              | Midazolam (5 mg) plus droperidol (5 mg) vs. droperidol (10 mg) vs. olanzapine (10 mg)                                                  | IV                                                 | RCT                      | Proportion of patients adequately sedated within 10 min of the first dose administration<br>Secondary outcomes: adequate sedation, the need for another sedative less than 60 min after achieving sedation, another sedative from 60 min after sedation until ED discharge, sedation medication failure (alternate medications required), ECG QTc interval, and adverse events | Airway obstruction, oxygen desaturation, hypotension, prolonged QTc in all groups<br>Bradycardia and hypoventilation with droperidol and olanzapine | those of IM haloperidol.<br>2B<br>Midazolam-droperidol combination therapy is superior, in the doses studied, to either droperidol or olanzapine monotherapy for IV sedation of the acutely agitated ED patient. No differences at 60 min.         |
| Tran-Johnson <sup>54</sup>             | 357 patients with acute agitation with a DSM-IV diagnosis of schizophrenia, schizoaffective disorder, or schizophreniform disorder | Aripiprazole (9.75) vs. haloperidol (7.5 mg)                                                                                           | IM                                                 | RCT                      | PANSS-EC and ACES from baseline to 2 hours after first injection                                                                                                                                                                                                                                                                                                               | Headache and extrapyramidal symptoms most frequently in haloperidol group                                                                           | 2B<br>IM aripiprazole 9.75 mg is a rapidly effective and well-tolerated alternative to IM haloperidol for the control of agitation, without over sedation, in patients with schizophrenia, schizoaffective disorder, or schizophreniform disorder. |
| TREC Collaborative Group <sup>55</sup> | 301 aggressive or agitated people                                                                                                  | Haloperidol (5-10 mg) + promethazine (50 mg) vs. midazolam (7.5-15 mg)                                                                 | IM                                                 | RCT                      | Patients tranquil or asleep by 40, 60, and 120 min                                                                                                                                                                                                                                                                                                                             | Respiratory depression with midazolam and seizure with haloperidol + promethazine                                                                   | 1B<br>Both treatments were effective.                                                                                                                                                                                                              |
| Veser <sup>56</sup>                    | 30 patients presenting to the emergency department with acute agitation and/or psychosis                                           | Oral risperidone (2 mg) + IM lorazepam (2 mg) vs. oral haloperidol (5 mg) + IM lorazepam (2 mg) vs. oral placebo + IM lorazepam (2 mg) | Risperidone and haloperidol<br>PO, lorazepam<br>IM | RCT                      | BRPS and PANSS at 30 and 90 min after medication was administered                                                                                                                                                                                                                                                                                                              | None                                                                                                                                                | 2B<br>There were no statistically significant differences among the groups at any point. Lorazepam alone was as effective as lorazepam plus haloperidol or lorazepam + risperidone.                                                                |
| Walther <sup>57</sup>                  | 43 severely agitated patients at acute care                                                                                        | Oral haloperidol (15 mg) vs. oral olanzapine (10                                                                                       | PO                                                 | Prospective, randomized, | PANSS at 2 and 24 hours after baseline                                                                                                                                                                                                                                                                                                                                         | EPS                                                                                                                                                 | 2B<br>All drugs were effective for rapid                                                                                                                                                                                                           |

| Reference              | Population                                                                                  | Intervention                                                                       | Route | Study type                                                               | Primary efficacy outcome measure                                                                            | Adverse events                                                                                                                                                                                       | Level of evidence                                                                                                                                                                                                          |
|------------------------|---------------------------------------------------------------------------------------------|------------------------------------------------------------------------------------|-------|--------------------------------------------------------------------------|-------------------------------------------------------------------------------------------------------------|------------------------------------------------------------------------------------------------------------------------------------------------------------------------------------------------------|----------------------------------------------------------------------------------------------------------------------------------------------------------------------------------------------------------------------------|
|                        | psychiatric units                                                                           | mg) vs. oral risperidone (2-6 mg)                                                  |       | rater-blinded, controlled design within a naturalistic treatment regimen |                                                                                                             |                                                                                                                                                                                                      | tranquilization within 2 hours.                                                                                                                                                                                            |
| Wright <sup>58</sup>   | 285 hospitalized patients with schizophrenia                                                | Olanzapine (10 mg) vs. haloperidol (7.5 mg) vs. placebo                            | IM    | RCT                                                                      | Agitated Behavior Scale, Agitation Calmness Evaluation Scale, PANSS                                         | Less EPSs with olanzapine compared to haloperidol                                                                                                                                                    | 2B<br>Both IM olanzapine and IM haloperidol reduced agitation significantly more than IM placebo.                                                                                                                          |
| Yap <sup>59</sup>      | 92 patients with methamphetamine-related acute agitation                                    | Midazolam (5 mg) + droperidol (5 mg) vs. droperidol (10 mg) vs. olanzapine (10 mg) | IV    | RCT                                                                      | Proportion of patients sedated adequately at 10 min after the initial dose administration and within 60 min | Oxygen desaturation and airway obstruction in all groups<br>Bradycardia with olanzapine<br>Prolonged QTc with midazolam + droperidol and olanzapine                                                  | 2B<br>A midazolam-droperidol combination appears to provide more rapid sedation of patients with methamphetamine-related acute agitation than droperidol or olanzapine alone. At 60 min the groups had similar results.    |
| Zhang <sup>60</sup>    | 376 agitated patients with schizophrenia                                                    | Ziprasidone (10-40 mg) vs. haloperidol (5-20 mg)                                   | IM    | RCT                                                                      | BARS                                                                                                        | Dizziness and somnolence, nausea, increased blood pressure, and hematemesis with ziprasidone<br>EPS and rash with haloperidol; peak measured QTc interval greater than or equal to 450 milliseconds. | 2B<br>Chinese study, ziprasidone had a favorable tolerability profile and comparable efficacy and safety compared to haloperidol                                                                                           |
| Zimbroff <sup>61</sup> | 301 patients experiencing acute agitation with bipolar I disorder, manic, or mixed episodes | Aripiprazole (9.75) vs. aripiprazole (15 mg) vs. lorazepam (2 mg) vs. placebo      | IM    | RCT                                                                      | PANSS-EC and ACES from baseline to 2 hours after first injection                                            | Over sedation with lorazepam and aripiprazole (15 mg)                                                                                                                                                | 2B<br>Aripiprazole (9.75) and (15 mg) are effective and well-tolerated for acute agitation in bipolar disorder, although the low incidence of over sedation suggests a risk-benefit profile for IM aripiprazole (9.75 mg). |

95%CI = 95% confidence interval; ABS = Agitated Behavior Scale; ACES = Agitation Calmness Evaluation Scale; BARS = Barnes Akathisia Rating Scale; BPRS = Brief Psychiatric Rating Scale; BZD = benzodiazepine; CT = clinical trial ; D/A(-) = drug and alcohol-negative ; D/A(+) = drug and alcohol-positive; ECG = electrocardiogram; ED = emergency department; EPS = extrapyramidal side effects; IM = intramuscular; IN = inhaled; IV = intravenous; NNT = number needed to treat; OAS = Overt Aggression Scale; OASS = Overt Agitation Severity Scale; ODT = orally dispersible tablet; OS = oral solution; PANSS-EC = Positive and Negative Syndrome Scale Excited Component; PO = from the Latin *per os*; RCT = randomized controlled trial; SD = standard deviation; SL = sublingual; TD = transdermal.

## References

1. Agid O, Kapur S, Warrington L, Loebel A, Siu C. Early onset of antipsychotic response in the treatment of acutely agitated patients with psychotic disorders. *Schizophr Res*. 2008;102:241-8.
2. Ahmed U, Jones H, Adams CE. Chlorpromazine for psychosis induced aggression or agitation. *Cochrane Database Syst Rev*. 2010;CD007445.
3. Alexander J, Tharyan P, Adams C, John T, Mol C, Philip J. Rapid tranquillisation of violent or agitated patients in a psychiatric emergency setting. Pragmatic randomised trial of intramuscular lorazepam v. haloperidol plus promethazine. *Br J Psychiatry*. 2004;185:63-9.
4. Allen MH, Feifel D, Lessem MD, Zimbroff DL, Ross R, Munzar P, et al. Efficacy and safety of loxapine for inhalation in the treatment of agitation in patients with schizophrenia: a randomized, double-blind, placebo-controlled trial. *J Clin Psychiatry*. 2011;72:1313-21.
5. Allen MH, Debanne M, Lazignac C, Adam E, Dickinson LM, Damsa C. Effect of nicotine replacement therapy on agitation in smokers with schizophrenia: a double-blind, randomized, placebo-controlled study. *Am J Psychiatry*. 2011;168:395-9.
6. Andrezina R, Josiassen RC, Marcus RN, Oren DA, Manos G, Stock E, et al. Intramuscular aripiprazole for the treatment of acute agitation in patients with schizophrenia or schizoaffective disorder: a double-blind, placebo-controlled comparison with intramuscular haloperidol. *Psychopharmacology (Berl)*. 2006;188:281-92.
7. Asadollahi S, Heidari K, Hatamabadi H, Vafae R, Yunesian S, Azadbakht A, et al. Efficacy and safety of valproic acid versus haloperidol in patients with acute agitation: results of a randomized, double-blind, parallel-group trial. *Int Clin Psychopharmacol*. 2015;30:142-50.
8. Baldaçara L, Sanches M, Cordeiro DC, Jackowski AP. Rapid tranquilization for agitated patients in emergency psychiatric rooms: a randomized trial of olanzapine, ziprasidone, haloperidol plus promethazine, haloperidol plus midazolam and haloperidol alone. *Rev Bras Psiquiatr*. 2011;33:30-9.
9. Baker RW, Kinon BJ, Maguire GA, Liu H, Hill AL. Effectiveness of rapid initial dose escalation of up to forty milligrams per day of oral olanzapine in acute agitation. *J Clin Psychopharmacol*. 2003;23:342-8.
10. Bieniek SA, Ownby RL, Penalver A, Dominguez RA. A double-blind study of lorazepam versus the combination of haloperidol and lorazepam in managing agitation. *Pharmacotherapy*. 1998;18:57-62.
11. Breier A, Meehan K, Birkett M, David S, Ferchland I, Sutton V, et al. A double-blind, placebo-controlled dose-response comparison of intramuscular olanzapine and haloperidol in the treatment of acute agitation in schizophrenia. *Arch Gen Psychiatry*. 2002;59:441-8.
12. Castle DJ, Udristoiu T, Kim CY, Sarosi A, Pidman V, Omar AN, et al. Intramuscular olanzapine versus short-acting typical intramuscular antipsychotics: comparison of real-life effectiveness in the treatment of agitation. *World J Biol Psychiatry*. 2009;10:43-53.
13. Chan EW, Taylor DM, Knott JC, Phillips GA, Castle DJ, Kong DC. Intravenous droperidol or olanzapine as an adjunct to midazolam for the acutely agitated patient: a multicenter, randomized, double-blind, placebo-controlled clinical trial. *Ann Emerg Med*. 2013;61:72-81.
14. Chan HY, Ree SC, Su LW, Chen JJ, Chou SY, Chen CK, et al. A double-blind, randomized comparison study of efficacy and safety of intramuscular olanzapine and intramuscular haloperidol in patients with schizophrenia and acute agitated behavior. *J Clin Psychopharmacol*. 2014;34:355-8.
15. Chouinard G, Annable L, Turnier L, Holobow N, Szkrumelak N. A double-blind randomized clinical trial of rapid tranquilization with I.M. clonazepam and I.M. haloperidol in agitated psychotic patients with manic symptoms. *Can J Psychiatry*. 1993;38 Suppl 4:S114-21.
16. Currier GW, Simpson GM. Risperidone liquid concentrate and oral lorazepam versus intramuscular haloperidol and intramuscular lorazepam for treatment of psychotic agitation. *J Clin Psychiatry*. 2001;62:153-7.
17. Currier GW, Chou JC, Feifel D, Bossie CA, Turkoz I, Mahmoud RA, et al. Acute treatment of psychotic agitation: a randomized comparison of oral treatment with risperidone and lorazepam versus intramuscular treatment with haloperidol and lorazepam. *J Clin Psychiatry*. 2004;65:386-94.
18. Daniel DG, Currier GW, Zimbroff DL, Allen MH, Oren D, Manos G, et al. Efficacy and safety of oral aripiprazole compared with haloperidol in patients transitioning from acute treatment with intramuscular formulations. *J Psychiatr Pract*. 2007;13:170-7.
19. Daniel DG, Potkin SG, Reeves KR, Swift RH, Harrigan EP. Intramuscular (IM) ziprasidone 20 mg is effective in reducing acute agitation associated with psychosis: a double-blind, randomized trial. *Psychopharmacology (Berl)*. 2001;155:128-34.
20. De Filippis S, Cuomo I, Lionetto L, Janiri D, Simmaco M, Caloro M, et al. Intramuscular aripiprazole in the acute management of psychomotor agitation. *Pharmacotherapy*. 2013;33:603-14.
21. Dorevitch A, Katz N, Zemishlany Z, Aizenberg D, Weizman A. Intramuscular flunitrazepam versus intramuscular haloperidol in the emergency treatment of aggressive psychotic behavior. *Am J Psychiatry*. 1999;156:142-4.
22. Escobar R, San L, Perez V, Olivares JM, Polavieja P, Lopez-Carrero C, et al. [Effectiveness results of olanzapine in acute psychotic patients with agitation in the emergency room setting: results from NATURA study]. *Actas Esp Psiquiatr*. 2008;36:151-7.
23. Fang M, Chen H, Li LH, Wu R, Li Y, Liu L, et al. Comparison of risperidone oral solution and intramuscular haloperidol with the latter shifting to oral therapy for the treatment of acute agitation in patients with schizophrenia. *Int Clin Psychopharmacol*. 2012;27:107-13.

24. Agid O, Kapur S, Warrington L, Loebel A, Siu C. Early onset of antipsychotic response in the treatment of acutely agitated patients with psychotic disorders. *Schizophr Res.* 2008;102:241-8.
25. Gillies D, Sampson S, Beck A, Rathbone J. Benzodiazepines for psychosis-induced aggression or agitation. *Cochrane Database Syst Rev.* 2013;9:CD003079.
26. Hsu WY, Huang SS, Lee BS, Chiu NY. Comparison of intramuscular olanzapine, orally disintegrating olanzapine tablets, oral risperidone solution, and intramuscular haloperidol in the management of acute agitation in an acute care psychiatric ward in Taiwan. *J Clin Psychopharmacol.* 2010;30:230-4.
27. Hatta K, Kawabata T, Yoshida K, Hamakawa H, Wakejima T, Furuta K, et al. Olanzapine orally disintegrating tablet vs. risperidone oral solution in the treatment of acutely agitated psychotic patients. *Gen Hosp Psychiatry.* 2008;30:367-71.
28. Huf G, Alexander J, Gandhi P, Allen MH. Haloperidol plus promethazine for psychosis-induced aggression. *Cochrane Database Syst Rev.* 2016;11:CD005146.
29. Huf G, Coutinho ES, Adams CE, Group TC. Rapid tranquillisation in psychiatric emergency settings in Brazil: pragmatic randomised controlled trial of intramuscular haloperidol versus intramuscular haloperidol plus promethazine. *BMJ.* 2007;335:869.
30. Isbister GK, Calver LA, Page CB, Stokes B, Bryant JL, Downes MA. Randomized controlled trial of intramuscular droperidol versus midazolam for violence and acute behavioral disturbance: the DORM study. *Ann Emerg Med.* 2010;56:392-401 e1.
31. Katagiri H, Fujikoshi S, Suzuki T, Fujita K, Sugiyama N, Takahashi M, et al. A randomized, double-blind, placebo-controlled study of rapid-acting intramuscular olanzapine in Japanese patients for schizophrenia with acute agitation. *BMC Psychiatry.* 2013;13:20.
32. Kinon BJ, Ahl J, Rotelli MD, McMullen E. Efficacy of accelerated dose titration of olanzapine with adjunctive lorazepam to treat acute agitation in schizophrenia. *Am J Emerg Med.* 2004;22:181-6.
33. Knott JC, Taylor DM, Castle DJ. Randomized clinical trial comparing intravenous midazolam and droperidol for sedation of the acutely agitated patient in the emergency department. *Ann Emerg Med.* 2006;47:61-7.
34. Kwentus J, Riesenberger RA, Marandi M, Manning RA, Allen MH, Fishman RS, et al. Rapid acute treatment of agitation in patients with bipolar I disorder: a multicenter, randomized, placebo-controlled clinical trial with inhaled loxapine. *Bipolar Disord.* 2012;14:31-40.
35. Lesem MD, Zajecka JM, Swift RH, Reeves KR, Harrigan EP. Intramuscular ziprasidone, 2 mg versus 10 mg, in the short-term management of agitated psychotic patients. *J Clin Psychiatry.* 2001;62:12-8.
36. Lesem MD, Tran-Johnson TK, Riesenberger RA, Feifel D, Allen MH, Fishman R, et al. Rapid acute treatment of agitation in individuals with schizophrenia: multicentre, randomised, placebo-controlled study of inhaled loxapine. *Br J Psychiatry.* 2011;198:51-8.
37. Lim HK, Kim JJ, Pae CU, Lee CU, Lee C, Paik IH. Comparison of risperidone orodispersible tablet and intramuscular haloperidol in the treatment of acute psychotic agitation: a randomized open, prospective study. *Neuropsychobiology.* 2010;62:81-6.
38. MacDonald K, Wilson MP, Minassian A, Vilke GM, Perez R, Cobb P, et al. A retrospective analysis of intramuscular haloperidol and intramuscular olanzapine in the treatment of agitation in drug- and alcohol-using patients. *Gen Hosp Psychiatry.* 2010;32:443-5.
39. MacDonald K, Wilson M, Minassian A, Vilke GM, Becker O, Tallian K, et al. A naturalistic study of intramuscular haloperidol versus intramuscular olanzapine for the management of acute agitation. *J Clin Psychopharmacol.* 2012;32:317-22.
40. Man PL, Chen CH. Rapid tranquilization of acutely psychotic patients with intramuscular haloperidol and chlorpromazine. *Psychosomatics.* 1973;14:59-63.
41. Mantovani C, Labate CM, Sponholz A, Jr., de Azevedo Marques JM, Guapo VG, de Simone Brito dos Santos ME, et al. Are low doses of antipsychotics effective in the management of psychomotor agitation? A randomized, rated-blind trial of 4 intramuscular interventions. *J Clin Psychopharmacol.* 2013;33:306-12.
42. Martel M, Sterzinger A, Miner J, Clinton J, Biros M. Management of acute undifferentiated agitation in the emergency department: a randomized double-blind trial of droperidol, ziprasidone, and midazolam. *Acad Emerg Med.* 2005;12:1167-72.
43. Nobay F, Simon BC, Levitt MA, Dresden GM. A prospective, double-blind, randomized trial of midazolam versus haloperidol versus lorazepam in the chemical restraint of violent and severely agitated patients. *Acad Emerg Med.* 2004;11:744-9.
44. Normann C, Schmauss M, Bakri N, Gerwe M, Schreiner A. Initial treatment of severe acute psychosis with fast orally disintegrating risperidone tablets. *Pharmacopsychiatry.* 2006;39:209-12.
45. Perrin E, Anand E, Dyachkova Y, Wagner T, Frediani S, Ballerini A, et al. A prospective, observational study of the safety and effectiveness of intramuscular psychotropic treatment in acutely agitated patients with schizophrenia and bipolar mania. *Eur Psychiatry.* 2012;27:234-9.
46. Pratts M, Citrome L, Grant W, Leso L, Opler LA. A single-dose, randomized, double-blind, placebo-controlled trial of sublingual asenapine for acute agitation. *Acta Psychiatr Scand.* 2014;130:61-8.
47. Preval H, Klotz SG, Southard R, Francis A. Rapid-acting IM ziprasidone in a psychiatric emergency service: a naturalistic study. *Gen Hosp Psychiatry.* 2005;27:140-4.
48. Raveendran NS, Tharyan P, Alexander J, Adams CE, Group TR-IIC. Rapid tranquillisation in psychiatric emergency settings in India: pragmatic randomised controlled trial of intramuscular olanzapine versus intramuscular haloperidol plus promethazine. *BMJ.* 2007;335:865.

49. Resnick M, Burton BT. Droperidol vs. haloperidol in the initial management of acutely agitated patients. *J Clin Psychiatry*. 1984;45:298-9.
50. Richards JR, Derlet RW, Duncan DR. Chemical restraint for the agitated patient in the emergency department: lorazepam versus droperidol. *J Emerg Med*. 1998;16:567-73.
51. Rosen CL, Ratliff AF, Wolfe RE, Branney SW, Roe EJ, Pons PT. The efficacy of intravenous droperidol in the prehospital setting. *J Emerg Med*. 1997;15:13-7.
52. Suzuki H, Gen K, Takahashi Y. A naturalistic comparison study of the efficacy and safety of intramuscular olanzapine, intramuscular haloperidol, and intramuscular levomepromazine in acute agitated patients with schizophrenia. *Hum Psychopharmacol*. 2014;29:83-8.
53. Taylor DM, Yap CYL, Knott JC, Taylor SE, Phillips GA, Karro J, et al. Midazolam-Droperidol, Droperidol, or Olanzapine for Acute Agitation: A Randomized Clinical Trial. *Ann Emerg Med*. 2017;69:318-26 e1.
54. Tran-Johnson TK, Sack DA, Marcus RN, Auby P, McQuade RD, Oren DA. Efficacy and safety of intramuscular aripiprazole in patients with acute agitation: a randomized, double-blind, placebo-controlled trial. *J Clin Psychiatry*. 2007;68:111-9.
55. Trec Collaborative Group. Rapid tranquillisation for agitated patients in emergency psychiatric rooms: a randomised trial of midazolam versus haloperidol plus promethazine. *BMJ*. 2003;327:708-13.
56. Veser FH, Veser BD, McMullan JT, Zealberg J, Currier GW. Risperidone versus haloperidol, in combination with lorazepam, in the treatment of acute agitation and psychosis: a pilot, randomized, double-blind, placebo-controlled trial. *J Psychiatr Pract*. 2006;12:103-8.
57. Walther S, Moggi F, Horn H, Moskvitin K, Abderhalden C, Maier N, et al. Rapid tranquilization of severely agitated patients with schizophrenia spectrum disorders: a naturalistic, rater-blinded, randomized, controlled study with oral haloperidol, risperidone, and olanzapine. *J Clin Psychopharmacol*. 2014;34:124-8.
58. Wright P, Birkett M, David SR, Meehan K, Ferchland I, Alaka KJ, et al. Double-blind, placebo-controlled comparison of intramuscular olanzapine and intramuscular haloperidol in the treatment of acute agitation in schizophrenia. *Am J Psychiatry*. 2001;158:1149-51.
59. Yap CYL, Taylor DM, Knott JC, Taylor SE, Phillips GA, Karro J, et al. Intravenous midazolam-droperidol combination, droperidol or olanzapine monotherapy for methamphetamine-related acute agitation: subgroup analysis of a randomized controlled trial. *Addiction*. 2017;112:1262-9.
60. Zhang H, Wang G, Zhao J, Xie S, Xu X, Shi J, et al. Intramuscular ziprasidone versus haloperidol for managing agitation in Chinese patients with schizophrenia. *J Clin Psychopharmacol*. 2013;33:178-85.
61. Zimbhoff DL, Marcus RN, Manos G, Stock E, McQuade RD, Auby P, et al. Management of acute agitation in patients with bipolar disorder: efficacy and safety of intramuscular aripiprazole. *J Clin Psychopharmacol*. 2007;27:171-6.
